# Supplementary material
Source: PubMed Central journal article supplement (PMC3093453)
Supplement: 1016451108_pnas.201016451SI.pdf [file 1016451108_pnas.201016451SI.pdf]

# Supporting Information

Jang et al. 10.1073/pnas.1016451108

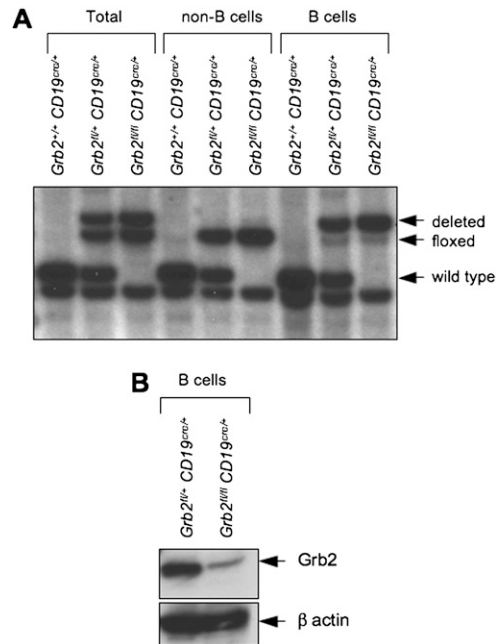

**Fig. S1.** Specific deletion of *grb2* in B cells. (A) Southern blot analysis of *grb2* alleles. Bands representing WT, floxed, and deleted *grb2* alleles are indicated by arrows. Genotype and cell types of the samples are indicated at the top of the blot. (B) Western blot analysis of *grb2* deletion in B cells.

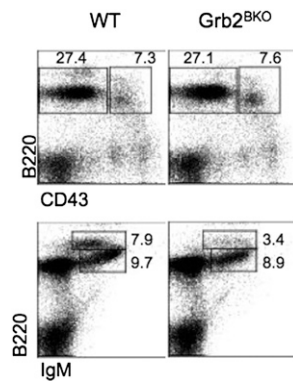

**Fig. S2.** Normal B-cell generation in the bone marrow (BM) of *Grb2<sup>BKO</sup>* mice. Flow cytometry analysis of the BM B-cell subsets in *Grb2<sup>BKO</sup>* mice. Shown are dot plots of BM cells stained for B220 and CD43 (Upper), B220 and IgM (Lower). Percentages of each B-cell subset are indicated in the plots.

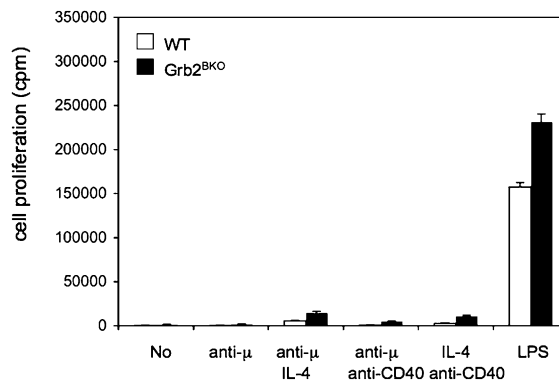

**Fig. S3.** In vitro proliferation of immature B cells. Immature T1 and T2 (AA4.1<sup>hi</sup>CD24<sup>hi</sup>) B cells were isolated by FACS sorting. Cells were cultured in 96-well plates ( $5 \times 10^4$  per well) in the presence of soluble anti- $\mu$  F(ab)<sub>2</sub>, IL-4, anti-CD40, and LPS, either alone or in different combinations for 48 h. <sup>3</sup>H-thymidine (1  $\mu$ Ci per well) was added to the culture for 12 h. <sup>3</sup>H-thymidine incorporation was determined on a  $\beta$ -counter. Shown are representatives of more than three independent experiments.

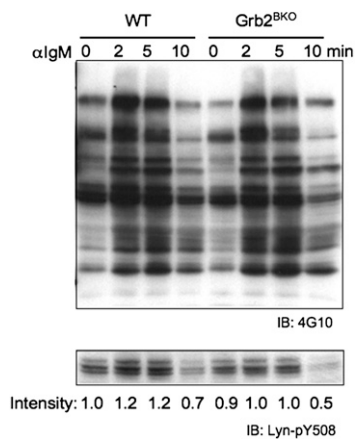

**Fig. S4.** B-cell receptor (BCR)-induced tyrosine phosphorylation of total cellular proteins and activation of Lyn kinase. Purified B cells were stimulated with anti-IgM for various periods. Tyrosine phosphorylation of total proteins and activation of Lyn were detected by an anti-phosphotyrosine antibody (4G10) and anti-active Lyn (Lyn-pY508).

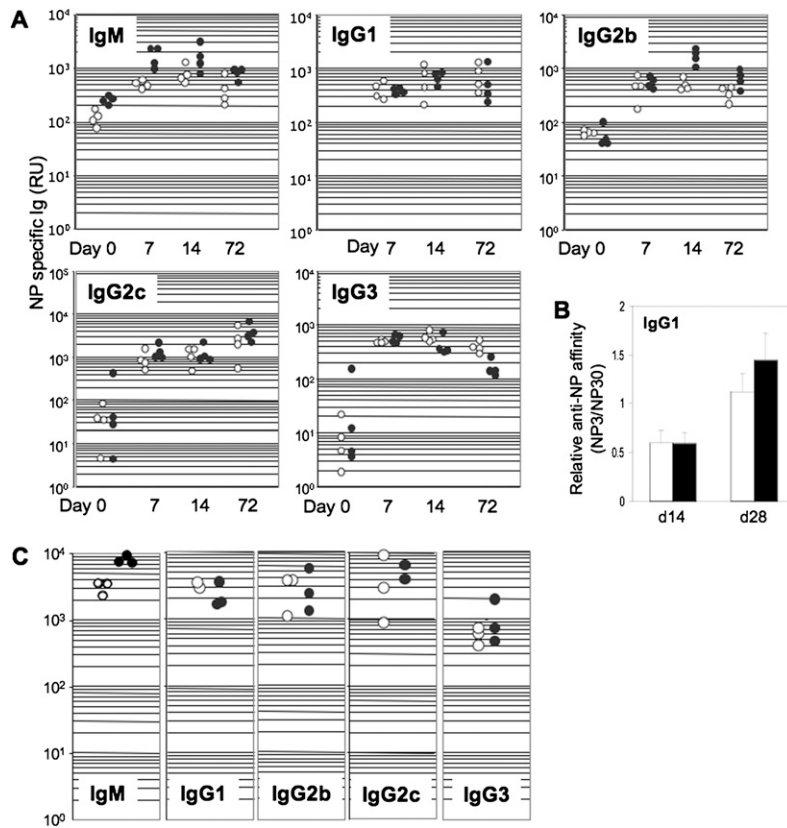

**Fig. 55.** *grb2*<sup>-/-</sup> B cells have undergone antibody affinity maturation and produce normal serum levels of antigen-specific IgM and IgG antibodies. (A) Serum levels of NP-specific Ig isotypes of WT (○) and Grb2<sup>BKO</sup> (●) mice at indicated time points after NP-KLH immunization were measured by ELISA. Each symbol represents the value obtained from one mouse. (B) Relative affinities of IgG1 of WT (white bars) and Grb2<sup>BKO</sup> (black bars) mice were determined at the indicated time points after antigenic challenge. Bars represent the mean ± SD (*n* = 5). (C) Serum levels of NP-specific Ig at day 7 after antigenic rechallenge. WT (○) and Grb2<sup>BKO</sup> (●) mice.

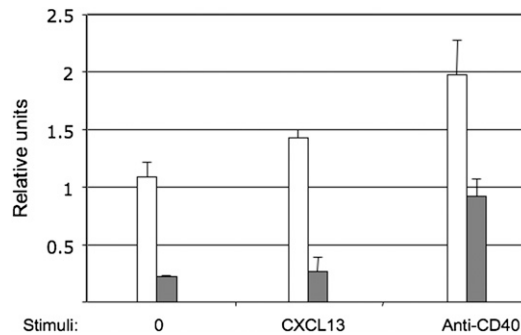

**Fig. 56.** In vitro up-regulation of lymphotoxin (LT)-β. Splenic B cells were purified from WT and Grb2<sup>BKO</sup> mice using the mouse B-cell enrichment kit (StemCell Tech). B cells were rested in RPMI medium with 0.1% FCS at 4 °C overnight, and then stimulated with either 3 μg/mL of CXCL13 or 10 μg/mL of anti-CD40 at 37 °C for 3.5 h. Total RNA was prepared from cell lysates and LTβ transcript was quantified by qRT-PCR and are shown as relative units after normalized to the expression of 18sRNA in the corresponding samples. *P* < 0.001, *n* = 3.

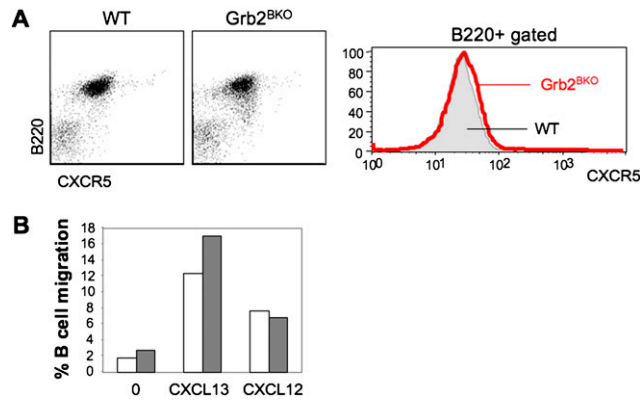

**Fig. S7.** *grb2*<sup>-/-</sup> B cells exhibit normal chemoattractant migration to CXCL12 and CXCL13. (A) Dot plots show splenocytes from WT and Grb2<sup>BKO</sup> mice stained with antibodies against B220 and CXCR5. Histograms show the CXCR5 expression level on WT B cells (shaded) or on *grb2*<sup>-/-</sup> B cells (red). (B) Chemotaxis of WT (white bars) or *grb2*<sup>-/-</sup> (gray bars) B cells toward CXCL12 and CXCL13 were analyzed by a transwell assay. The input and migrated splenocytes were stained with anti-B220-Alexa 780, and the number of B cells in each population was determined by flow cytometry. The percentages of migration of splenic B cells toward CXCL13 and CXCL12 are shown.

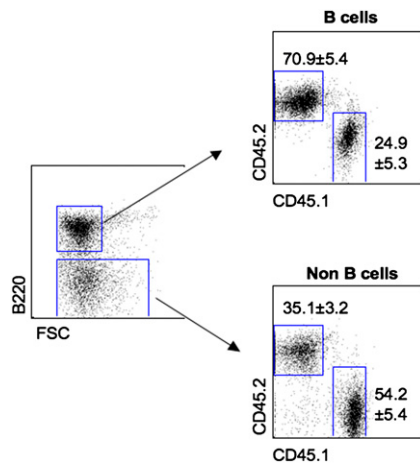

**Fig. S8.** Preferential expansion of *grb2*<sup>-/-</sup> B cells in BM chimeras. BM chimeras were generated by transferring equal numbers (10<sup>6</sup>) of BM cells from CD45.1<sup>+</sup> WT and CD45.2<sup>+</sup> Grb2<sup>BKO</sup> mice into irradiated CD45.1<sup>+</sup> WT recipients (*n* = 4). Flow cytometry analysis was carried out 2 mo after transplantation. Splenocytes were stained with anti-B220-Alexa 780, anti-CD45.1-Alexa 450, and anti-CD45.2-APC. B220<sup>+</sup> and B220<sup>-</sup> populations are gated, and the cells of Grb2<sup>BKO</sup> or WT origin were displayed as CD45.2<sup>+</sup> and CD45.1<sup>+</sup> cells, respectively. The inversed chimerism between B cells and non-B cells indicates that *grb2*<sup>-/-</sup> B cells have undergone preferential expansion.

**Table S1. Numbers of subset B cells in the bone marrow and spleen**

|                 | Grb2 <sup>+/+</sup> | Grb2 <sup>BKO</sup> |
|-----------------|---------------------|---------------------|
| Bone marrow     | ( <i>N</i> = 6)     | ( <i>N</i> = 7)     |
| Pre-B           | 5.9 ± 2.3           | 5.8 ± 2.2           |
| Pro-B           | 1.6 ± 0.5           | 1.5 ± 0.2           |
| Immature B      | 2.8 ± 1.3           | 0.9 ± 0.6           |
| Recirculating B | 2.3 ± 0.8           | 0.9 ± 0.6           |
| Spleen          | ( <i>N</i> = 8)     | ( <i>N</i> = 8)     |
| Immature B      | 4.0 ± 1.3           | 1.8 ± 0.8*          |
| T1              | 1.7 ± 0.5           | 0.7 ± 0.4*          |
| T2              | 2.0 ± 0.8           | 0.8 ± 0.3*          |
| Mature B        | 23.0 ± 7.1          | 15.7 ± 5.7**        |
| FO              | 16.4 ± 4.9          | 9.7 ± 4.2**         |
| MZ              | 3.0 ± 1.3           | 2.4 ± 0.9           |
| B1              | 1.9 ± 0.9           | 2.3 ± 1.1           |

Numbers shown here represent data from six to eight mice. Bone marrow pro-B, IgM-IgD-B220<sup>lo</sup>CD43<sup>+</sup>; Pre-B, IgM-IgD-B220<sup>lo</sup>CD43<sup>-</sup>; immature B, B220<sup>lo</sup>IgM<sup>+</sup>IgD<sup>-</sup>; recirculating B, B220<sup>hi</sup>IgD<sup>+</sup>. Cell surface markers for splenic B cell subsets are described in the legend to Fig. 1. Shown is mean ± SD. \**P* < 0.01; \*\**P* < 0.05.
